# Supplementary material
Source: ML conference proceedings conference paper supplement (https://openreview.net/forum?id=ig4gfspaOq)
Supplement: supplementary_material [file Supplementary_Material_NeurIPS_2025.pdf › Wavy-Transformer/Supplementary_Material_NeurIPS_2025.pdf]

---

# Supplementary Material for Wavy Transformer

---

Anonymous Author(s)

Affiliation

Address

email

**Note to reviewers.** The following section is an *extended version* of material already included in the main submission. It is provided here for ease of review only; in the camera-ready version, it will be moved to Appendix F of the main manuscript and supplied as part of the official appendix. Please note that this relocation will update the reference and table numbers accordingly.

## Throughput–Accuracy Trade-off Comparison

Table 1 compares the inference throughput (images/s) of various transformer variants, measured on the ImageNet validation set using V100 GPUs and a batch size of 256. Introducing wave dynamics (Diffuse+Wave or Wave alone) reduces throughput by roughly 50% from about 2 600 to 1 200–1 300 images per second which may pose a limitation in real-time applications. However, this slowdown must be balanced against the gains in representational power and accuracy that wave-enhanced models provide. A simple mitigation is to insert wavy blocks in only a subset of layers to recover part of the lost throughput. Concretely, replacing only the last six blocks with wavy blocks (Wave (6)) increases throughput by about 33 % relative to the full Diffuse+Wave with FeatScale variant (1 649 img/s vs. 1 241 img/s) while sacrificing 0.18 pt in Top-1 accuracy (72.44 % vs. 72.62 %). In this experiment, the velocity tensor was initialized to zero at the first wavy block, and all other conditions were identical to those of the full Diffuse + Wave with FeatScale variant.

Table 1: Inference throughput and accuracy on ImageNet. Wave (6) indicates that wavy blocks are inserted only in the final six layers.

| Model                   | Residual Connections | Throughput    | Top-1 (%)    |
|-------------------------|----------------------|---------------|--------------|
| DeiT-Ti [1]             | Diffuse              | <b>2632.1</b> | 72.17        |
| DeiT-Ti + FeatScale [2] | Diffuse              | 2483.2        | 72.35        |
| DeiT-Ti                 | Diffuse+Wave         | 1266.0        | 72.33        |
| DeiT-Ti + FeatScale     | Diffuse+Wave         | 1241.4        | <b>72.62</b> |
| DeiT-Ti                 | Wave                 | 1312.2        | –            |
| DeiT-Ti + FeatScale     | Diffuse+Wave (6)     | 1649.3        | 72.44        |

## References

- [1] Hugo Touvron, Matthieu Cord, Matthijs Douze, Francisco Massa, Alexandre Sablayrolles, and Herve Jegou. Training data-efficient image transformers & distillation through attention. In *International Conference on Machine Learning*, pages 10347–10357, 2021.
- [2] Peihao Wang, Wenqing Zheng, Tianlong Chen, and Zhangyang Wang. Anti-oversmoothing in deep vision transformers via the fourier domain analysis: From theory to practice. In *International Conference on Learning Representations*, 2022.
